# Supplementary material for: Combined Metabolic Activators with Different NAD+ Precursors Improve Metabolic Functions in the Animal Models of Neurodegenerative Diseases
Source: Biomedicines. 2024 Apr 22;12(4):927. doi: 10.3390/biomedicines12040927 (PMC11048203; doi:10.3390/biomedicines12040927)
Supplement: Supplementary file 1 [file biomedicines-12-00927-s001.zip › Altay et al_NDD_DatasetS1.xlsx]

## Sheet: Biochemistry (AD + HFD)
Group	Description	Numbers			ALP	AST	ALT	LDH	TG	TC	HDL	LDL	Albumin	Glucose	Creatinin	UricAcid
1	CD (5 weeks)	N = 4		1	276	273	69	1075	40	49	25	19	2.71	149	0.3	0.9
2	CD (5 weeks) + STZ	N = 4		1	190	128	60	489	34	39	25	12	2.62	143	0.35	0.8
3	HFD (3 weeks)	N = 4		1	228	130	63	734	47	36	20	13	2.58	154	0.27	0.6
4	HFD (5 weeks)	N = 4		1	278	224	68	679	42	50	26	18	2.74	142	0.34	1.1
5	HFD (5 weeks) + STZ	N = 2		2	757	114	74	297	278	86	38	40	2.99	149	0.33	0.8
6	HFD (5 weeks) +STZ + Ser (2 weeks)	N = 4		2	448	123	102	649	333	67	26	29	2.88	161	0.32	1.2
7	HFD (5 weeks) + STZ + NAC (2 weeks)	N = 3		2	384	105	75	648	232	74	33	34	3.17	150	0.25	0.8
8	HFD (5 weeks) + STZ + LCAT (2 weeks)	N = 4		2	403	108	70	809	266	70	33	33	3.11	164	0.33	0.6
9	HFD (5 weeks) + STZ + NR (2 weeks)	N = 4		3	535	164	105	396	224	83	28	43	2.83	162	0.36	1.1
10	HFD (5 weeks) + STZ + NAM (2 weeks)	N = 2		3	461	159	92	1175	278	87	37	40	2.76	204	0.34	1
11	HFD (5 weeks) + STZ + Ser + NAC + LCAT (2 weeks)	N = 4		3	583	210	83	1265	283	104	38	46	2.47	239	0.38	1.2
12	HFD (5 weeks) + STZ +CMA1 (2 weeks)	N = 3		3	649	205	72	1254	227	88	45	43	2.75	266	0.41	4.6
13	HFD (5 weeks) + STZ + CMA2(2 weeks)	N = 3		4	395	254	73	893	48	49	26	21	2.19	162	0.19	1.1
				4	296	251	83	1573	107	61	36	25	3.05	210	0.28	1.6
				4	503	236	113	317	55	36	19	15	1.97	137	0.16	0.7
				4	381	207	71	1434	78	50	28	22	2.19	175	0.28	1.4
				5	440	120	68	662	233	82	42	42	2.81	193	0.28	1.3
				5	707	162	73	1007	398	64	26	31	2.49	198	0.27	1.3
				6	661	171	85	538	196	61	30	31	2.64	217	0.41	1.1
				6	484	187	106	610	64	60	32	31	2.39	203	0.39	1.5
				6	808	147	75	627	157	46	26	25	2.6	222	0.58	1.4
				6	609	98	51	400	151	65	30	34	2.44	181	0.29	0.8
				7	294	188	63	977	41	76	42	30	3.26	221	0.55	3.4
				7	751	195	105	582	78	71	31	38	2.74	215	0.48	1.5
				7	179	146	51	603	53	79	38	43	3.08	230	0.6	3.5
				8	666	139	65	1103	111	74	34	36	2.88	182	0.34	1.1
				8	1400	138	95	395	104	72	34	33	2.9	192	0.32	1
				8	843	150	54	539	54	87	44	42	2.8	314	0.53	1.8
				8	1025	151	117	891	95	90	47	35	2.77	185	0.33	1.3
				9	621	104	70	442	63	56	36	23	2.67	154	0.26	0.6
				9	1425	187	77	644	92	86	39	42	2.58	180	0.3	1.1
				9	344	178	160	586	137	74	37	32	2.8	177	0.3	1
				9	992	196	122	913	93	64	42	28	2.8	191	0.3	1.4
				10	117	130	28	379	46	39	26	16	2.05	223	0.24	1.1
				10	530	149	89	557	97	78	45	40	3.01	190	0.4	1.2
				11	635	164	123	799	279	50	25	22	2.9	183	0.35	0.8
				11	1122	260	148	821	174	94	43	44	2.75	175	0.39	1.2
				11	356	267	77	1088	196	87	46	38	4.28	169	0.7	1
				11	454	175	95	696	117	84	37	43	2.61	178	0.36	0.7
				12	571	133	63	404	122	72	39	31	2.65	210	0.27	0.8
				12	200	137	68	806	85	78	43	37	2.73	188	0.36	1.3
				12	139	262	342	851	101	69	39	31	3.18	222	0.4	0.9
				13	211	103	55	715	96	58	32	27	2.84	213	0.3	1.3
				13	886	188	104	643	147	80	41	40	2.9	220	0.33	1.1
				13	593	156	97	1314	123	64	36	27	3.09	185	0.27	1.6

## Sheet: Histopathological Scale
Table. Definition of histopathological scale in brain
	None (-)	Very mild (+)	Mild (++)	Moderate (+++)	Severe (++++)
Degeneration (number of degenerated neurons)	0	1-8	9-15	16-25	>25
Necrosis (number of necrotic neurons)	0	1-5	6-10	11-15	>15
Hyperemia (number of hyperemic vessels in an area)	0	1-3	4-8	9-12	>12
Table. Definition of histopathological scale in liver
	None (-)	Very mild (+)	Mild (++)	Moderate (+++)	Severe (++++)
Degeneration (number of degenerated hepatocytes)	0	1-7	8-18	19-30	>30
Necrosis (number of necrotic hepatocytes)	0	1-5	6-14	15-25	>25
Hyperemia (number of hyperemic vessels in an area)	0	3-5	6-10	11-20	>20

## Sheet: Weight
	Initial	1st week	2nd week	3rd week	4th week	5th week		Weights Mean
(HFD-STZ)+Ser	365	322	317	367	348	352		Groups		Initial	1st week	2nd week	3rd week	4th week	5th week
	366	368	355	331	396	396			(HFD-STZ)+Ser	372.75	366.5	365	345	352.75	354
	380	386	387	300	350	353			(HFD-STZ)+NAC	362.75	357.5	379	364.25	337.667	338.333
	380	390	401	382	317	315			(HFD-STZ)+LCAT	345.5	362.75	382.25	362.5	363.75	367
(HFD-STZ)+NAC	345	349	368	383	324	323			(HFD-STZ)+NR	341.25	358.5	378.5	356.5	350.25	354
	351	351	373	366	354	354			(HFD-STZ)+NAM	354.75	361.25	378.75	352.667	333.5	333.5
	367	359	380	344	335	338			(HFD-STZ)+Ser+NAC+LCAT	358.25	391.25	399.5	377	376	375.25
	388	371	395	364					(HFD-STZ)+Ser+NAC+LCAT+NR	352.25	388	399.5	373.667	367	368
(HFD-STZ)+LCAT	317	337	354	380	349	356			CD+STZ	348	354	380.75	410	420.5	425
	343	358	374	360	378	377			HFD+STZ (5w)	391.25	421.75	426.75	447	464.5	470.25
	359	373	393	350	381	387			HFD (3w)	417	444.25	456
	363	383	408	360	347	348			CD (5w)	370	366.25	343	334.75	325.75	323.25
(HFD-STZ)+NR	319	341	374	343	363	368			CD (3w)	391	422.75	402.5
	335	351	376	364	353	361			(HFD-STZ)+Ser+NAC+LCAT+NAM	344.25	368.75	384.5	363	358	364
	351	369	379	369	356	361
	360	373	385	350	329	326
(HFD-STZ)+NAM	340	338	367	350	314	317
	340	353	372	354	353	350
	359	361	373	354
	380	393	403
(HFD-STZ)+Ser+NAC+LCAT	353	377	386	390	364	359
	354	391	402	380	383	389
	363	396	403	370	372	367		Weights Standard deviation
	363	401	407	368	385	386		Groups		Initial	1st week	2nd week	3rd week	4th week	5th week
(HFD-STZ)+CMA1	348	379	396	362	345	353			(HFD-STZ)+Ser	8.38153	31.1716	37.3452	36.8511	32.5512	33.116
	351	383	397	376	362	360			(HFD-STZ)+NAC	19.2246	9.98332	11.7473	15.9661	15.1767	15.5027
	354	394	402	383	394	391			(HFD-STZ)+LCAT	20.8726	20.0062	23.4147	12.5831	18.246	18.0924
	356	396	403						(HFD-STZ)+NR	18.0808	15.0886	4.79583	12.0692	14.7733	18.9561
STZ	369	284	359	401	407	414			(HFD-STZ)+NAM	19.0679	23.2146	16.3783	2.3094	27.5772	23.3345
	315	331	368	409	434	436			(HFD-STZ)+Ser+NAC+LCAT	5.5	10.3401	9.25563	10.1325	9.83192	14.5688
	331	396	391	420					(HFD-STZ)+CMA1	3.5	8.28654	3.51188	10.6927	24.8797	20.2237
	377	405	405						CD+STZ	29.7769	57.1373	21.0456	9.53939	19.0919	15.5563
HFD+STZ (5w)	381	410	416	445	467	475			HFD+STZ (5w)	8.61684	8.8459	12.3659	22.8765	18.7705	17.0563
	390	421	420	458	438	446			HFD (3w)	14.4684	6.34429	8.60233
	392	425	427	416	482	486			CD (5w)	39.6316	27.4272	22.0151	29.4434	26.9738	27.4029
	402	431	444	469	471	474			CD (3w)	13.3915	8.38153	11.6762
HFD (3w)	404	437	446	Sacrified					(HFD-STZ)+CMA2	7.16473	9.32291	9.20145	21.5019	22.3681	20.664
	406	442	452
	424	446	461
	434	452	465
Control (5w)	334	348	324	295	299	294
	340	348	325	330	317	313
	416	363	355	355	324	327
	390	406	368	359	363	359
CD (3w)	384	415	391	Sacrified
	386	418	394
	411	424	411
	383	434	414
(HFD-STZ)+CMA2	343	348	348	335	364	371
	340	353	383	376	328	336
	346	384	387	378	382	385
	348	390	420
