# Supplementary material for: Combined Metabolic Activators with Different NAD+ Precursors Improve Metabolic Functions in the Animal Models of Neurodegenerative Diseases
Source: Biomedicines. 2024 Apr 22;12(4):927. doi: 10.3390/biomedicines12040927 (PMC11048203; doi:10.3390/biomedicines12040927)
Supplement: Supplementary file 1 [file biomedicines-12-00927-s001.zip › Altay et al_NDD_DatasetS2.xlsx]

## Sheet: Biochemistry
Groups	WBC	RBC	HGB	HCT	MCV	MCH	MCHC	PLT	ALP	AST	ALT	LDH	TRIGLYCERIDE	TOTAL CHOLESTEROL	HDL CHOLESTEROL	LDL CHOLESTEROL	TOTAL PROTEIN	ALBUMIN	TOTAL BILIRUBIN	DIRECT BILIRUBIN	GLUCOSE	BUN	CREATININE	URIC ACID
CD	8.33	5.74	9.1	29.9	52.1	15.9	30.4	708	139	133	67	723	48	46	27	12	6.06	3.97	0.02	0.03	146	10.7	0.32	1.7
CD	9.77	7.39	13.7	34.5	50.2	16.5	30.8	334	102	117	48	788	82	37	23	7	5.79	3.51	0.01	0.02	150	8.8	0.29	1.3
CD	6.97	5.51	9.3	30.4	55.2	16.9	30.6	830	141	141	52	687	68	54	37	11	5.58	3.68	0.01	0.01	143	12.8	0.27	1.1
HFD	18.21	9.53	15.4	51.2	53.7	16.2	30.1	867	551	199	44	739	136	70	52	19	6.35	4.19	0.03	0.04	145	16.1	0.31	1.2
HFD	15.08	9.72	17.4	55.8	57.4	17.9	31.2	387	742	119	43	662	150	64	42	15	6.43	3.58	0.04	0.04	142	13	0.38	0.8
HFD	18.05	9.75	16.3	54.9	56.3	16.7	29.7	679	646	196	49	666	126	66	40	18	6.55	4.03	0.06	0.05	124	17.6	0.41	1.1
CD + 6-OHDA	15.4	9.39	15.4	51.2	54.5	16.4	30.1	912	276	158	56	1417	93	50	36	9	5.63	3.93	0.03	0.02	125	19.3	0.26	1.2
CD + 6-OHDA	11.1	9.57	16.6	53.3	55.7	17.3	31.1	480	131	133	54	756	78	38	23	8	5.84	3.3	0.01	0.01	125	18.2	0.27	1
CD + 6-OHDA	14.73	9.44	17.1	55.8	59.1	18.1	30.6	702	212	113	46	904	60	39	25	8	5.59	3.94	0.03	0.02	141	15.6	0.25	1
HFD + 6-OHDA	15.26	10.16	18.1	57.6	56.7	17.8	31.4	987	400	139	42	789	104	68	38	24	5.8	4.02	0.07	0.05	131	10.9	0.27	1.2
HFD + 6-OHDA	21.2	9.29	15.6	50.3	54.1	16.8	31	867	464	132	47	981	152	74	43	22	5.64	3.88	0.06	0.04	158	16.1	0.33	1.4
HFD + 6-OHDA	17.83	9.35	16.1	54.2	58	17.2	29.7	859	379	133	49	750	146	51	30	16	5.69	3.63	0.02	0.03	154	9.8	0.26	1.6
Ser	11.34	10.34	17.7	60.1	58.1	17.1	29.5	1120	566	108	50	1038	96	60	42	15	6.03	3.73	0.01	0.03	170	14.8	0.36	1.1
Ser	15.44	10.08	17.9	57.1	56.6	17.8	31.3	899	536	107	49	649	117	59	36	17	5.31	3.68	0.02	0.04	152	12.5	0.27	2
Ser	16.59	8.81	15.7	51.9	58.9	17.8	30.3	411	697	100	46	839	56	52	36	15	5.78	3.08	0.05	0.04	171	10.5	0.36	0.9
Ser	15.75	8.65	17.9	56.5	65.3	20.7	31.7	984	367	100	47	706	121	48	29	14	5.89	3.88	0.02	0.03	146	9.9	0.28	1.5
Ser	16.13	10.65	18	59.8	56.2	16.9	30.1	749	616	120	35	937	106	52	34	13	5.61	3.66	0.03	0.03	151	10.1	0.32	1.5
NAC	16	9.42	16	54.5	57.9	17	29.4	1014	509	103	38	756	59	45	20	17	6.19	3.12	0.03	0.03	149	7.4	0.35	1.6
NAC	15.35	11.66	18.2	60.7	52.1	15.6	30	1162	558	128	47	539	102	50	30	15	6.23	3.87	0.02	0.02	182	9.9	0.34	1.1
NAC	19.64	9.98	17.5	58.7	58.8	17.5	29.8	1106	468	116	37	955	131	50	34	11	5.97	3.88	0.02	0.04	138	9.7	0.28	1.1
NAC	13.36	10.16	18.1	61	60	17.8	29.7	887	501	135	48	562	75	45	27	15	5.51	3.88	0.04	0.01	165	13	0.38	1.2
LCAT	17.55	9.86	17.9	59.9	60.8	18.2	29.9	624	333	138	50	950	124	57	32	18	5.63	3.85	0.03	0.01	186	11.4	0.34	1.1
LCAT	9.45	9.31	16.5	56.7	60.9	17.7	29.1	751	500	108	51	778	107	57	35	18	6.2	3.93	0.01	0.02	159	12.7	0.34	1.4
LCAT	10.09	10.41	18.6	61	58.6	17.9	30.5	888	470	95	46	486	121	55	31	16	5.08	3.68	0.01	0.03	164	11.4	0.33	0.9
LCAT	7.39	9.75	17.4	59.7	61.2	17.8	29.1	1123	553	135	60	817	100	68	48	17	5.74	4.27	0.04	0.04	161	11.8	0.3	1.2
NR	7.39	9.49	16.3	54.9	57.9	17.2	29.7	246	420	236	64	714	96	64	34	18	5.9	3.34	0.01	0.03	150	10.8	0.35	1.1
NR	9.7	6.3	11.3	35	55.6	17.9	32.3	362	356	156	48	873	93	64	32	22	5.59	3.56	0.01	0.03	153	8.3	0.35	0.8
NR	18.35	10.73	18.6	61.6	57.4	17.3	30.2	1115	465	187	64	705	71	38	24	10	5.53	3.64	0.03	0.03	185	10.8	0.39	1.1
NR	14.92	10.66	17.7	60.6	56.8	16.6	29.2	966	289	135	48	598	92	50	31	13	5.4	3.58	0.05	0.01	156	8.4	0.34	1.5
NAM	14.2	10.7	19.1	64.4	60.2	17.9	29.7	967	560	160	78	684	104	71	49	16	5.98	4	0.03	0.03	172	14.5	0.46	1.2
NAM	9.3	9.8	19.3	64.4	56.6	17	30	692	627	158	60	646	88	57	40	14	5.96	3.83	0.03	0.02	168	13.1	0.41	1
NAM	8.47	9.95	16.2	55	55.3	16.3	29.5	725	415	228	80	764	76	50	34	12	5.92	3.98	0.04	0.04	158	13.7	0.37	1.2
NAM	12.5	11	19.4	63.3	57.5	17.6	30.6	1154	515	144	41	577	92	49	31	11	5.36	3.81	0.05	0.03	117	7.1	0.26	0.8
Ser + NAC + LCAT	9.87	11.38	19.4	62.5	54.9	17	31	1216	555	119	43	605	63	38	21	13	5.68	3.23	0.03	0.02	169	12.7	0.43	2.3
Ser + NAC + LCAT	9.89	9.79	18.3	59.8	61.1	18.7	30.6	892	548	190	72	676	69	56	37	16	5.22	3.22	0.03	0.02	183	12.4	0.4	1.3
Ser + NAC + LCAT	7.14	11.1	18.2	61.8	55.7	16.4	29.4	1036	560	198	60	976	116	56	31	14	5.33	3.31	0.01	0.03	165	14.7	0.26	1.3
Ser + NAC + LCAT	7.49	10.52	18.8	61.2	58.2	17.9	30.7	1092	357	146	44	893	103	55	36	12	5.88	3.67	0.02	0.02	170	13.4	0.39	1.2
CMA1	13.75	9.97	17.3	59.2	59.4	17.4	29.2	1141	463	307	69	897	70	49	29	17	5.26	3.42	0.01	0.02	148	13.7	0.42	1.3
CMA1	13.49	10.69	17.5	58.8	55	16.4	29.8	245	370	189	66	885	106	53	34	15	4.92	3.02	0.01	0.02	153	13.4	0.39	1.5
CMA1	12.72	10.24	16.3	56.3	55	15.9	29	929	511	193	62	683	111	62	43	15	5.31	3.92	0.01	0.02	161	13.7	0.33	1
CMA1	12.37	10.31	16.9	58.8	57	16.4	28.7	677	519	143	56	772	128	54	40	16	5.45	3.45	0.01	0.03	177	12.2	0.41	1.6
CMA2	8.73	8.93	15.9	53.5	59.9	17.8	29.7	1116	480	215	69	912	78	45	26	16	5.51	2.65	0.02	0.02	140	14.6	0.4	1.4
CMA2	13.4	10.86	17.3	59	54.3	15.9	29.3	1293	338	243	57	890	78	54	24	16	5.8	2.55	0.01	0.02	157	11	0.36	1.5
CMA2	14.89	9.49	17.3	60	63.2	18.2	28.8	1271	508	127	39	781	118	48	31	12	6.06	4.23	0.01	0.02	142	9	0.25	1.3
CMA2	15.19	9.65	15.5	50.1	51.9	16.1	30.9	1321	482	176	63	712	119	41	29	10	5.57	3.56	0.02	0.04	161	11.6	0.38	1.3
CMA2	7.88	10.13	17	56.4	55.7	16.8	30.1	954	448	167	40	872	96	54	23	13	6.58	2.89	0.06	0.05	142	7.9	0.34	1.2

## Sheet: Locomotor After Treatment
Group	Stereotypic	Ambulatory	Vertical	Resting %	Distance (cm)	Horizantal
CD	367	629	68	53	2018	2680
CD	451	666	51	47	1985	2952
CD	395	486	31	52	1143	1736
HFD	424	811	50	52	2372	3148
HFD	526	578	43	48	1661	2726
HFD	325	542	17	59	1319	1900
CD + 6-OHDA	320	166	14	71	508	1160
CD + 6-OHDA	177	280	18	74	767	942
CD + 6-OHDA	248	262	13	76	675	997
HFD + 6-OHDA	320	144	9	82	412	1096
HFD + 6-OHDA	152	302	12	86	636	820
HFD + 6-OHDA	213	228	13	88	560	867
Ser	280	201	10	69	749	1217
Ser	170	372	14	76	461	918
Ser	241	258	15	71	718	979
Ser	284	263	13	66	605	1038
Ser	340	209	12	68	551	1098
NAC	206	608	22	68	1380	1993
NAC	434.667	598	23.6667	51.3333	1559.24	2292.33
NAC	315	686	28	66	1172	1726
NAC	275	500	21	58	1325	1958
LCAT	308	390	15	52	1143	2327
LCAT	499	446	4	56	998	1890
LCAT	366	485	42	60	1206	1792
LCAT	310	543	47	62	1450	2007
NR	384	897	33	50	2150	2036
NR	501	664	45	45	1135	1680
NR	314	707	32	47	1645	2834
NR	248	551	41	66	1420	1618
NAM	356	415	12	57	1092	1954
NAM	445	678	37	47	1797	2646
NAM	469	587	25.3333	50.3333	1619.39	2471.33
NAM	279	668	27	47	1968	2214
Ser + NAC + LCAT	319	532	36	60	1286	1727
Ser + NAC + LCAT	582	579	19	45	1727	2864
Ser + NAC + LCAT	386	489	18	59	1347	1955
Ser + NAC + LCAT	275	369	26	58	1161	1779
CMA1	439	512	42	55	1351	1991
CMA1	498	517	14	52	1374	2880
CMA1	344	358	33	67	1185	1958
CMA1	438	428	29	59	1970	1584
CMA2	531	770	37	39	1825	3643
CMA2	355	368	28	66	1259	1559
CMA2	260	812	42	56	2537	2724
CMA2	339.75	648	31.75	53.5	1951.48	2579.5
CMA2	350	642	33	53	1793	2392

## Sheet: Apomorphine Induced Rotation
GROUP	Controlateral
CD	0						Groups	Animals
CD	0						CD	3
CD	0						HFD	3
HFD	0						6-OHDA	3
HFD	0						HFD + 6-OHDA	3
HFD	0						Ser	5
CD + 6-OHDA	180						NAC	4
CD + 6-OHDA	210						LCAT	4
CD + 6-OHDA	160						NR	4
HFD + 6-OHDA	275						NAM	4
HFD + 6-OHDA	310						Ser + NAC + LCAT	4
HFD + 6-OHDA	325						CMA1	4
Ser	195						CMA2	5
Ser	145
Ser	105
Ser	135
Ser	157
NAC	115
NAC	115
NAC	115
NAC	265
LCAT	115
LCAT	75
LCAT	105
LCAT	155
NR	45
NR	80
NR	75
NR	85
NAM	70
NAM	40
NAM	90
NAM	65
Serine + NAC + LCAT	110
Serine + NAC + LCAT	60
Serine + NAC + LCAT	110
Serine + NAC + LCAT	125
CMA1	105
CMA1	125
CMA1	85
CMA1	40
CMA2	15
CMA2	30
CMA2	110
CMA2	60
CMA2	55

## Sheet: Contralateral Turns
Apomorphine-induced rotation test analysis of rats treated with HFD, 6-OHDA and different metabolic activators in the animal model of PD.
Groups	Contralateral Turns
CD + 6-OHDA	183,34±4,94***
HFD + 6-OHDA	303,38±13,66***
HFD+6-OHDA+Ser	128,10±9,03***
HFD+6-OHDA +NAC	114,20±9,56***
HFD+6-OHDA+LCAT	116,50±16,3***
HFD+6-OHDA +NR	109,05±7,75***
HFD+6-OHDA +NAM	107,25±12,82***
HFD+6-OHDA Ser+NAC+LCAT	47,25±9,42***
HFD+6-OHDA +CMA1	41,50±10,51***
HFD+6-OHDA +CMA2	40,80±5,85***
The difference between individual and combined metabolic activators-treated group and HFD + 6-OHDA group. Statistical significance is derived from one-way ANOVA, groups differences are calculate according to the Post-HOC Tukey test and Asterisks (***) denotes p<0.001. CD: chow diet, 6-OHDA: 6-hydroxydopamine hydrochloride, HFD: high-fat diet, Ser: L-serine, NAC: N-acetyl-L-cysteine, LCAT: L-carni…
